# Supplementary material for: Optimizing chain alignment and preserving the pristine structure of single-ether based PBTTT helps improve thermoelectric properties in sequentially doped thin films
Source: Royal Society of Chemistry journal article supplement (doi:10.1039/d2tc03600b), 2022-01-01
Supplement: d2tc03600b1.pdf [file d2tc03600b1.pdf]

*Supporting information*

**Optimizing chain alignment and preserving the pristine structure of single-  
ether based PBTTT helps improve thermoelectric properties in sequentially  
doped thin films**

Huiyan Zeng<sup>1</sup>, Pablo Durand<sup>2</sup>, Shubhradip Guchait<sup>1</sup>, Laurent Herrmann<sup>1</sup>, Céline Kiefer<sup>3</sup>,  
Nicolas Leclerc<sup>2\*</sup> and Martin Brinkmann<sup>1\*</sup>

(1) Université de Strasbourg, CNRS, ICS UPR 22, F-67000 Strasbourg, France

(2) Université de Strasbourg, CNRS, ICPEES UMR 7515, F-67087 Strasbourg, France

(3) Université de Strasbourg, CNRS, IPCMS UMR 7504, F-67087 Strasbourg, France

**Corresponding authors:**

Nicolas Leclerc: [leclercn@unistra.fr](mailto:leclercn@unistra.fr)

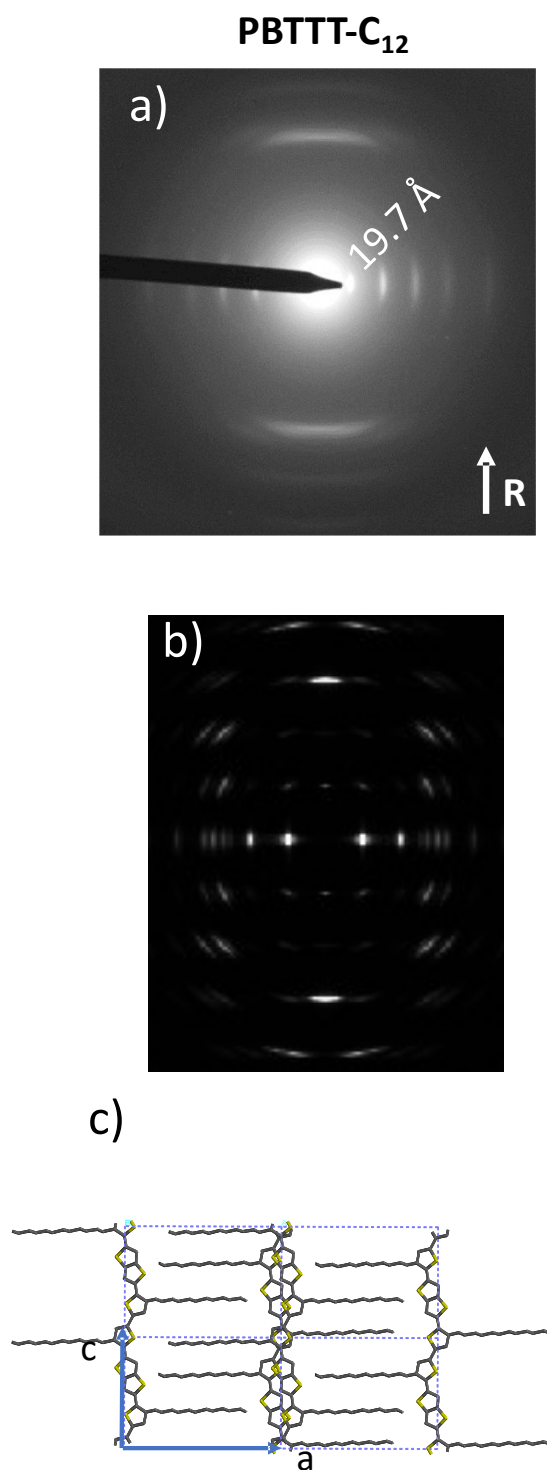

**Figure S1.** a) ED pattern of oriented PBTTT-C<sub>12</sub> aligned by rubbing at 125°C. b) fiber pattern calculated using Cerius<sup>2</sup> for the structural model shown in figure c) with alkyl side chains oriented perpendicular to the PBTTT backbone.

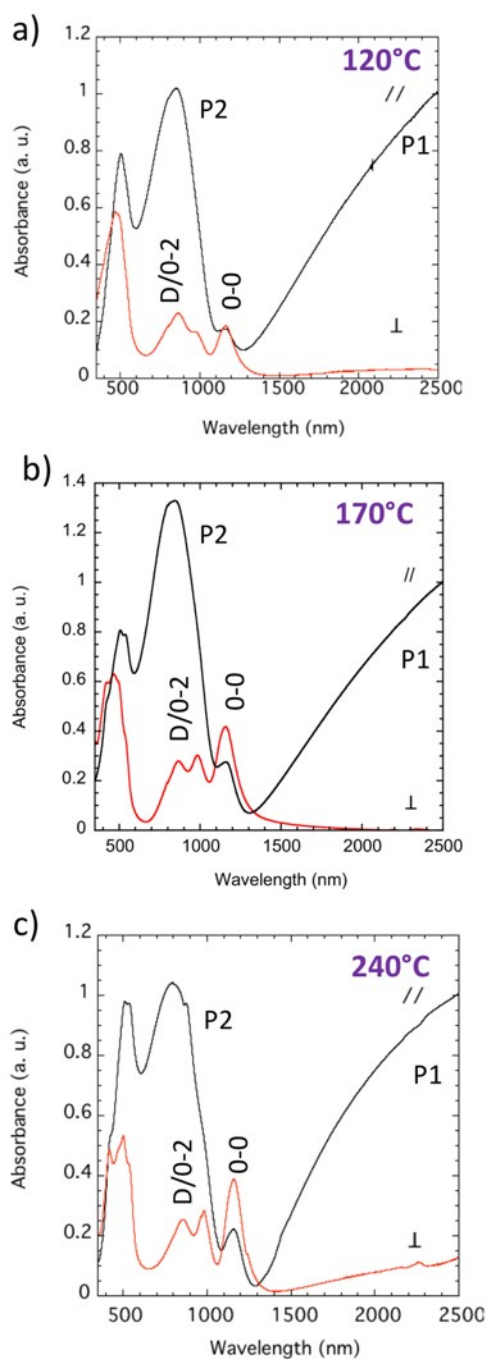

**Figure S2.** Evolution of the UV-vis-NIR polarized spectra of PBTTT-<sup>8</sup>O thin films oriented by high temperature rubbing at a) 120°C, b) 170°C and c) 240°C. The spectra are recorded for incident light oriented parallel (//) and perpendicular (red, ⊥) to the rubbing direction. The major features are annotated, including the contribution of F<sub>6</sub>TCNNQ<sup>-</sup> dimers (D) that overlaps with that of molecular F<sub>6</sub>TCNNQ<sup>-</sup>.

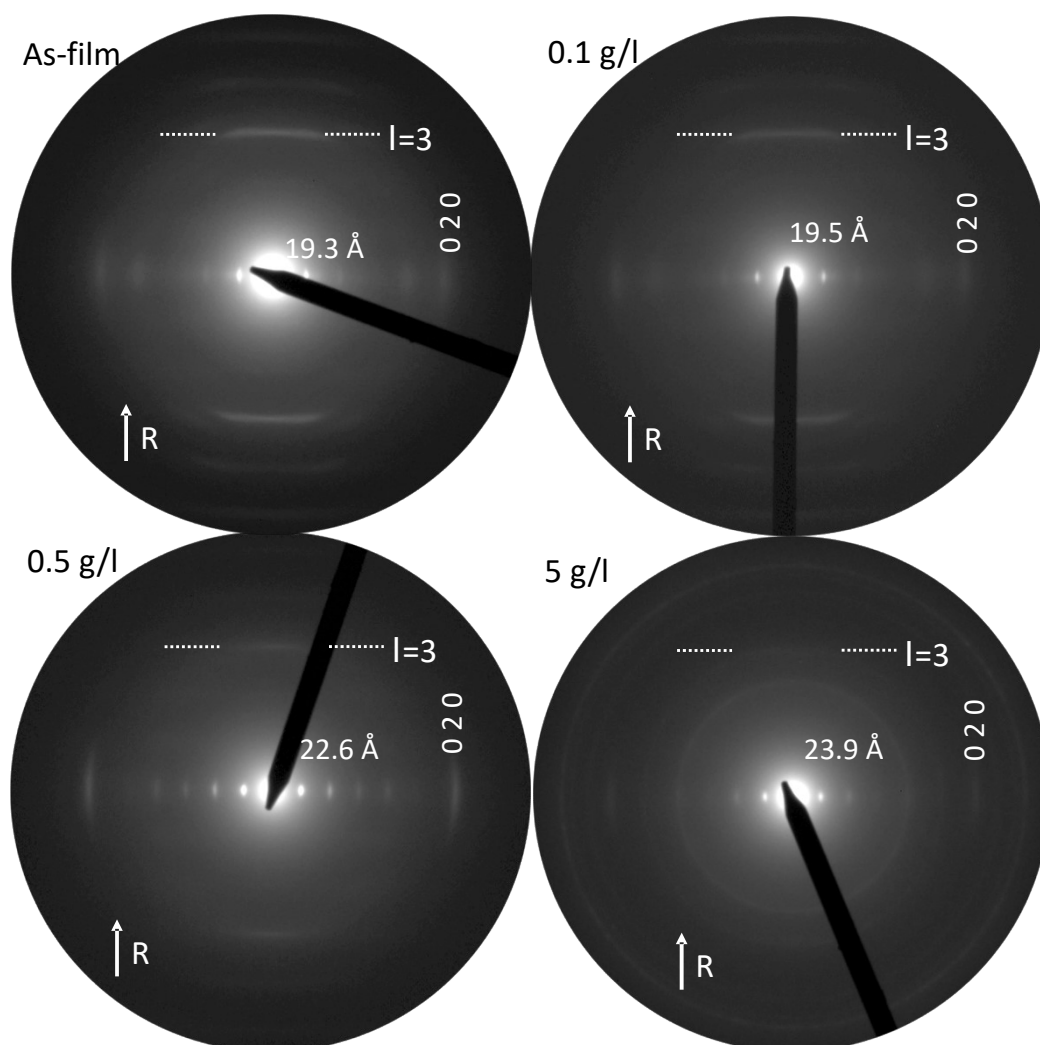

**Figure S3.** Evolution of the ED pattern of oriented PBTTT-<sup>8</sup>O rubbed at 170°C as a function of the concentration of FeCl<sub>3</sub> (in nitromethane). Note the fading of the meridional reflections in the  $l=3$  layer line with increasing doping level. This is symptomatic of the destruction of  $\pi$ -stacking in individual  $\pi$ -stacks of PBTTT backbones upon FeCl<sub>3</sub> dopant intercalation. The intensity of the equatorial 0 2 0 and the  $h$  0 0 reflections ( $h=1-3$ ) is particularly reduced for [FeCl<sub>3</sub>]=5g/l.

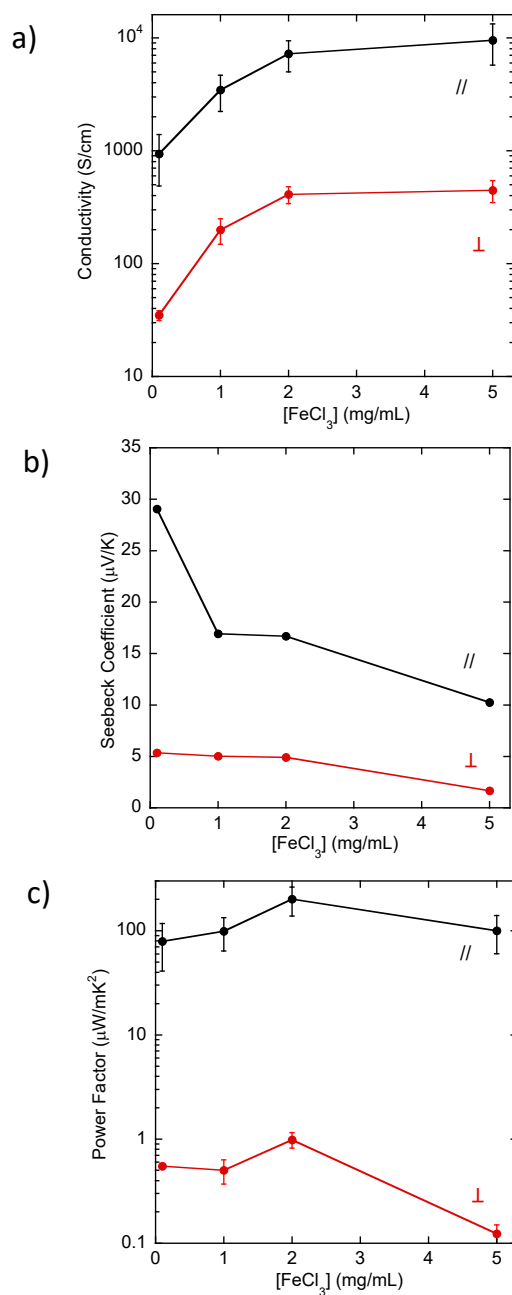

**Figure S4.** Evolution of the charge conductivity (a), Seebeck coefficient (b) and power factor (c) for oriented PBTtT-<sup>8</sup>O thin films ( $T_R=170^\circ\text{C}$ ) doped with  $\text{FeCl}_3$  in nitromethane for the orientation parallel (black symbols) and perpendicular (red symbols) to the rubbing direction.
